# Supplementary material for: New evidence for the effect of type 2 diabetes and glycemic traits on testosterone levels: a two-sample Mendelian randomization study
Source: Front Endocrinol (Lausanne). 2023 Oct 11;14:1238090. doi: 10.3389/fendo.2023.1238090 (PMC10600375; doi:10.3389/fendo.2023.1238090)
Supplement: Supplementary file 5 [file Table_5.xlsx]

## Sheet: Sheet1
Supplementary Table 5. Result and sensitivity analyses for the associations of genetically predicted fasting insulin with testosterone levels
	Inverse variance weighted							Weighted median					MR-Egger estimate					MR-Egger intercept				MR-PRESSO
	Q	Cochran's Q test, P value	Beta	(95%CI)	SE	P value		Beta	(95% CI)	SE	P value		Beta	(95% CI)	SE	P value		Intercept	SE	P value		Outliers	Global test, P value	Beta *	SE *	95% CI	P value	Distortion test, P value
Fasting insulin
TT
All	765.296	<0.001	-0.0483801	(-0.181,0.084)	0.0674612	0.473279		-0.127239	(-0.186,-0.069)	0.0297758	<0.001		0.164353	(-0.230,0.558)	0.201049	0.380584		-0.0037744	0.00336177	0.26898		12	<0.001	-0.079994	0.0247771	(-0.129, -0.031)	<0.001	0.4905
Male	610.672	<0.001	-0.192992	(-0.494,0.108)	0.153382	0.208303		-0.457977	(-0.597,-0.319)	0.0706798	<0.001		0.214543	(-0.665,1.094)	0.44872	0.635622		-0.00725957	0.00751079	0.340593		8	<0.001	-0.323466	0.0682939	(-0.457, -0.190)	<0.001	0.3668
Female	242.606	<0.001	0.0380287	(-0.154,0.230)	0.0981783	0.698502		-0.00307028	(-0.139,0.132)	0.0691054	0.964562		0.301907	(-0.260,0.864)	0.286813	0.299936		-0.00470116	0.00480069	0.334366		4	<0.001	-0.136136	0.0599405	(-0.254, -0.019)	0.030475	0.1397
BT
All	128.87	<0.001	0.259634	(0.175,0.344)	0.0429983	<0.001		0.245569	(0.164,0.327)	0.0416445	<0.001		0.269728	(0.014,0.058)	0.130354	0.0457647		-0.000179077	0.00217952	0.934972		4	<0.001	0.302466	0.0298559	(0.244, 0.361)	<0.001	0.257
Male	101.171	<0.001	0.21562	(0.087,0.344)	0.0656252	0.00101757		0.219991	(0.096,0.344)	0.0630821	<0.001		0.283644	(-0.097,0.664)	0.194186	0.153284		-0.00121163	0.00325002	0.711606		2	<0.001	0.253166	0.055244	(0.145, 0.361)	<0.001	0.5591
Female	196.26	<0.001	0.467005	(0.286,0.648)	0.0923782	<0.001		0.585085	(0.449,0.721)	0.069567	<0.001		0.361854	(-0.173,0.897)	0.273061	0.19395		0.00187313	0.00457021	0.684482		5	<0.001	0.566426	0.0551603	(0.458, 0.675)	<0.001	0.1422
SHBG
All	2728.21	<0.001	-0.283199	(-0.464,-0.102)	0.0922426	0.00213945		-0.366903	(-0.427,-0.307)	0.0306533	<0.001		-0.0623963	(-0.605,0.481)	0.277065	0.823094		-0.0039183	0.00463398	0.403384		10	<0.001	-0.338891	0.0268715	(-0.392, -0.286)	<0.001	0.3209
Male	1325.72	<0.001	-0.506946	(-0.960,-0.054)	0.231277	0.0283837		-0.846879	(-1.011,-0.683)	0.0837028	<0.001		-0.101613	(-1.438,1.235)	0.681732	0.882393		-0.00722008	0.0114104	0.531121		8	<0.001	-0.633645	0.0830953	(-0.797, -0.471)	<0.001	0.2008
Female	1064.08	<0.001	-0.714284	(-1.093,-0.335)	0.193267	<0.001		-0.913356	(-1.076,-0.751)	0.082773	<0.001		-0.204676	(-1.312,0.903)	0.565003	0.719402		-0.00908006	0.0094584	0.343833		6	<0.001	-0.901844	0.0733474	(-1.046, -0.758)	<0.001	0.1171
CI, confidence interval; SE, standard error; MR, Mendelian randomisation; MR-PRESSO, Mendelian randomization-pleiotropy residual sum and outlier
* Outlier-corrected estimate. NA, not available (if no outliers were detected).
